# Supplementary material for: The fermented soy beverage Q-CAN® plus induces beneficial changes in the oral and intestinal microbiome
Source: PubMed Central journal article supplement (PMC7931600; doi:10.1186/s40795-021-00408-4), 2021-03-04

FIGURE S6

A Lean-Genus Saliva

Pre Q-CAN

On Q-CAN

Post Q-CAN

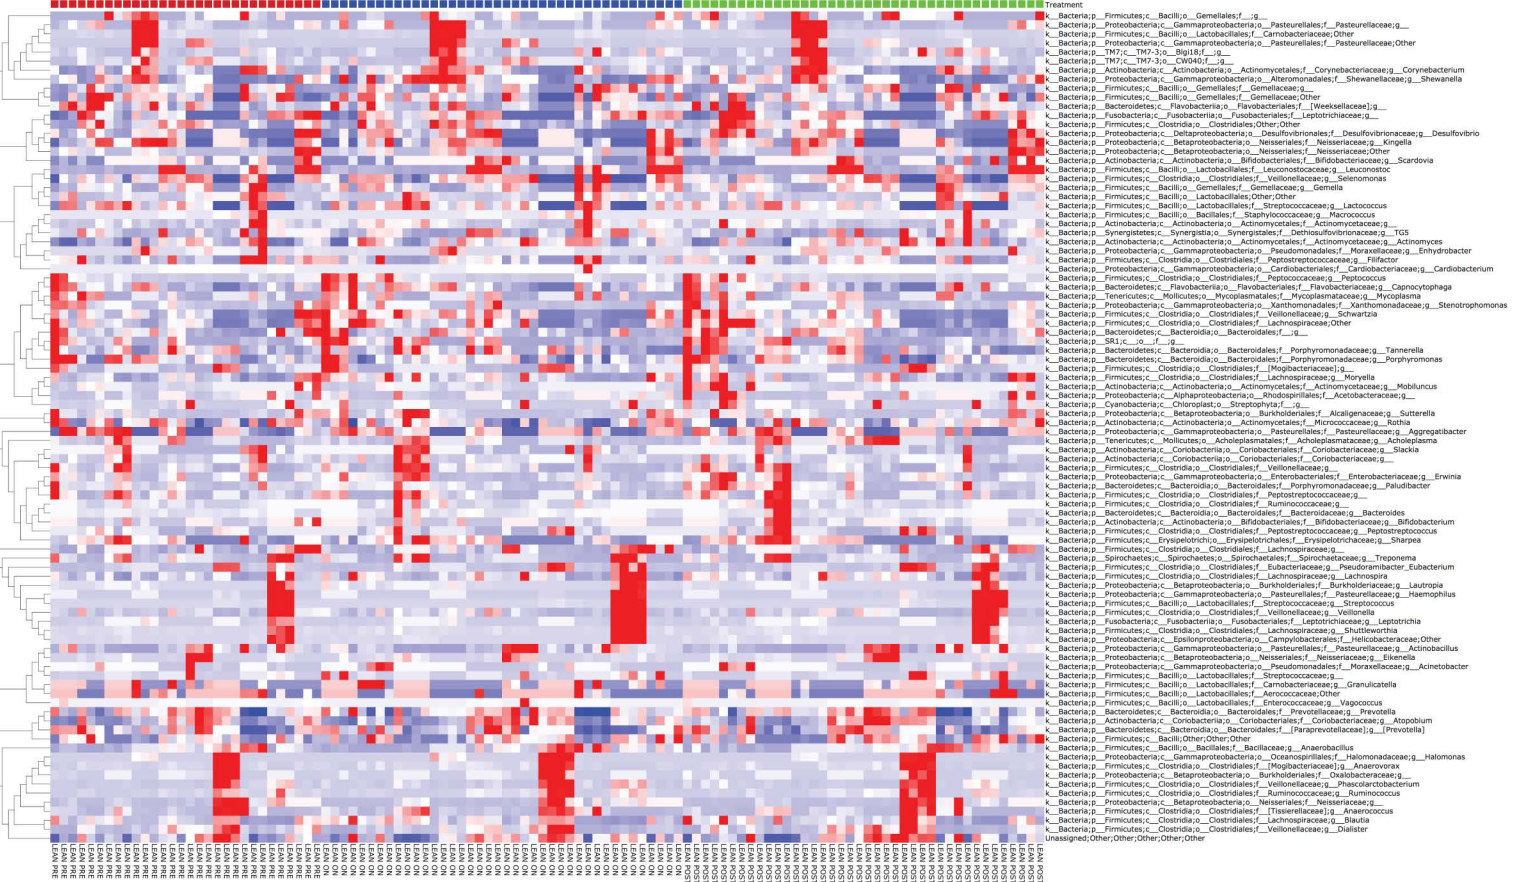

B Obese-Genus Saliva

Pre Q-CAN

On Q-CAN

Post Q-CAN

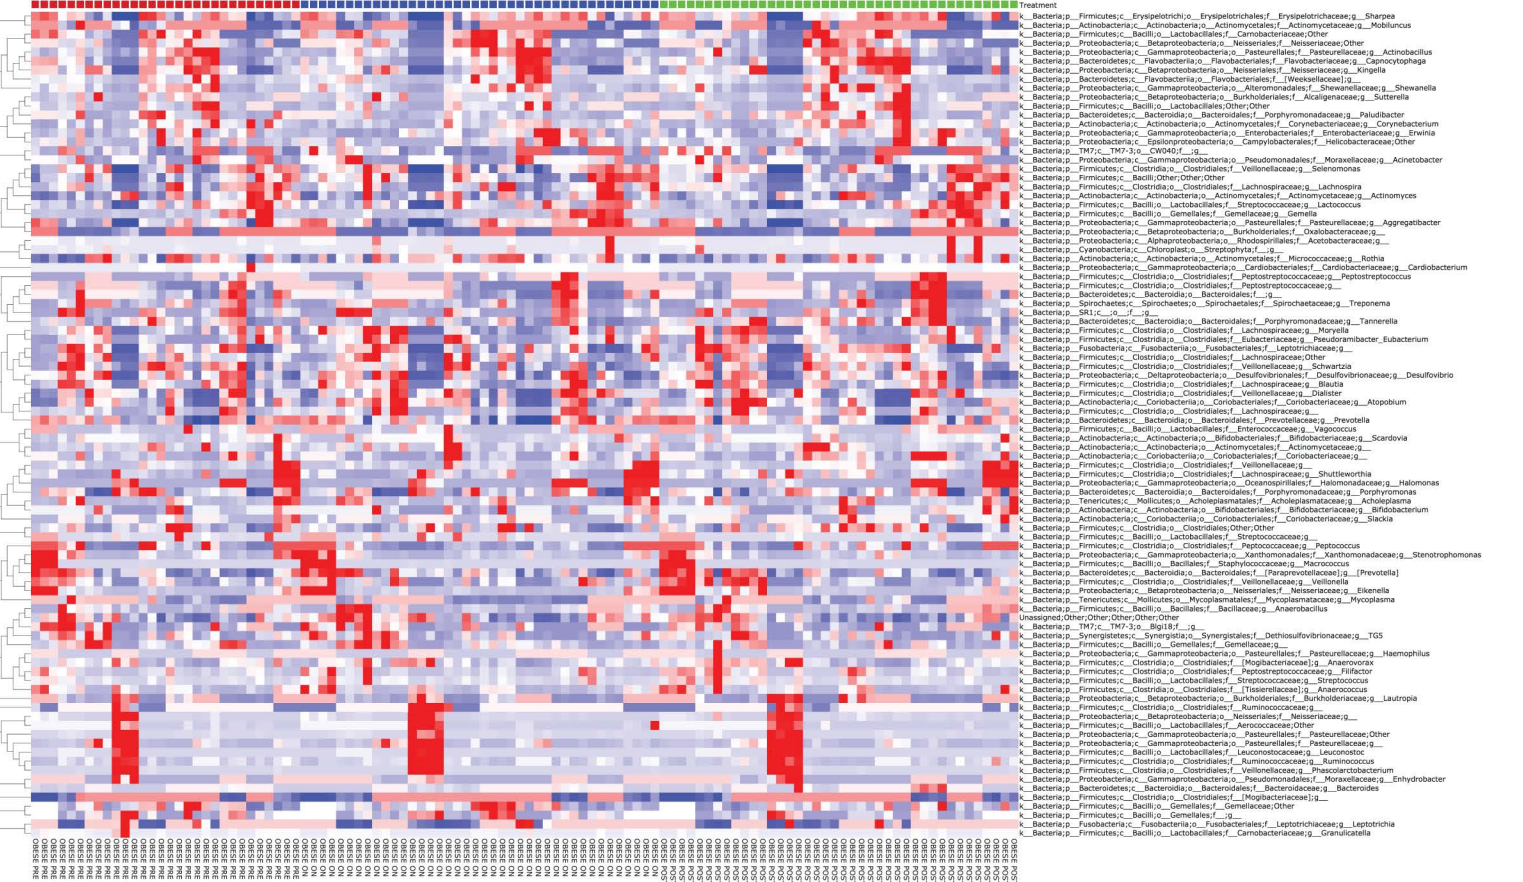

Supplement: 40795_2021_408_MOESM6_ESM.pdf [file 40795_2021_408_MOESM6_ESM.pdf]
